# Supplementary material for: Results from a multi-laboratory ocean metaproteomic intercomparison: effects of LC-MS acquisition and data analysis procedures
Source: Copernicus journal article supplement (doi:10.5194/bg-21-4889-2024), 2024-11-08
Supplement: Supplementary file 1 [file bg-21-4889-2024-supplement.pdf]

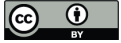

*Supplement of*

**Results from a multi-laboratory ocean metaproteomic intercomparison: effects of LC-MS acquisition and data analysis procedures**

**Mak A. Saito et al.**

*Correspondence to:* Mak A. Saito ([msaito@whoi.edu](mailto:msaito@whoi.edu))

The copyright of individual parts of the supplement might differ from the article licence.

1  
2  
3  
4  
5  
6  
7  
8  
9  
10  
11

**Results from a Multi-Laboratory Ocean Metaproteomic Intercomparison: Effects of LC-MS Acquisition and Data Analysis Procedures**

**Supplemental Materials**

**Table of Contents:**

Supplemental Tables S1-S12

Supplemental Figures S1-S4

12  
13  
14  
15

**Table S1.** Participants in wet-lab (W) and informatic (I) components of the 2020-2021 OCB ocean intercomparison study.

| Institution(s)                              | Participants                                                          | Role |
|---------------------------------------------|-----------------------------------------------------------------------|------|
| College of Charleston & NIST                | Mike Janech, Ben Neely                                                | W    |
| Dalhousie University                        | Erin Bertrand, Scott McCain, Elden Rowland                            | W/I  |
| Ghent University                            | Tim Van Den Bossche, Lennart Martens                                  | I    |
| Naval Research Laboratory                   | Judson Hervey, Dasha Leary, Jaimee Compton, Sophie Colston, Gary Vora | I    |
| Rowan University and Rutgers University     | Eli Moore, Haiyan Zheng                                               | W    |
| Oak Ridge National Laboratory               | Bob Hettich, Samantha Peters, Richard Giannone                        | W/I  |
| Ohio State University                       | Brian Searle                                                          | I    |
| TU Delft                                    | Martin Pabst and Hugo Kleikamp                                        | I    |
| University of Chicago                       | Jake Waldbauer                                                        | W    |
| University of Minnesota                     | Pratik Jagtap, Tim Griffin, Subina Mehta                              | I    |
| University of Vienna                        | Gerhard J. Herndl and Zihao Zhao                                      | W/I  |
| University of Washington<br>Genome Sciences | Brook Nunn                                                            | W    |
| University of Washington<br>Oceanography    | Rick Keil, Jacqui Neibauer, Megan Duffy                               | W    |
| Woods Hole Oceanographic Institution        | Mak Saito, Matthew McIlvin, Dawn Moran                                | W/I  |

16 **Table S2.** Metadata for laboratory intercomparison samples. Volumes filtered through 142 mm  
17 pump heads and corresponding volume per slice.

18

| Pump / Pump head / Sample name | Volume filtered (L) | Volume per 1/8 <sup>th</sup> slice (L) |
|--------------------------------|---------------------|----------------------------------------|
| Pump 2L / BATS 1 / pump 1A     | 221.6*              | 27.7                                   |
| Pump 2R / BATS 2 / pump 1B     | 167.3*              | 20.9                                   |
| Pump 1L / BATS 3 / pump 2A     | 235.1+              | 29.4                                   |
| Pump 1R / BATS 4 / pump 2B     | 211.1+              | 26.3                                   |

19

\* Pump 1 total gauge = 447 L, sum of two pump gauges = 446.2 L

20

+ Pump 2 total gauge = 478 L, sum of two gauges = 388.9 L, discrepancy of 89 L, gauges on pump head are assumed more accurate, as leaks in

21

system could create the additional flow for the total pump gauge.

22

23 **Table S3.** Sample metadata and accession numbers.

| Expedition ID,<br>Sample name          | Location (Lat/Long) | Depth (m) | Date<br>(mm-dd-<br>yyyy) | Time (UTC;<br>sampler<br>recovery) | ProteomXchange ID                                                       |
|----------------------------------------|---------------------|-----------|--------------------------|------------------------------------|-------------------------------------------------------------------------|
| <i>Laboratory<br/>Intercomparison</i>  | --                  | --        | --                       | --                                 | --                                                                      |
| BATS 348, Lab 127                      | 31.66 N 64.166 W    | 80        | 06-16-2018               | 08:00:00                           | PXD043218                                                               |
| BATS 348, Lab 135                      | 31.66 N 64.166 W    | 80        | 06-16-2018               | 08:00:00                           | PXD043218                                                               |
| BATS 348, Lab 209                      | 31.66 N 64.166 W    | 80        | 06-16-2018               | 08:00:00                           | PXD043218                                                               |
| BATS 348, Lab 438                      | 31.66 N 64.166 W    | 80        | 06-16-2018               | 08:00:00                           | PXD043218                                                               |
| BATS 348, Lab 593                      | 31.66 N 64.166 W    | 80        | 06-16-2018               | 08:00:00                           | PXD043218                                                               |
| BATS 348, Lab 652                      | 31.66 N 64.166 W    | 80        | 06-16-2018               | 08:00:00                           | PXD043218                                                               |
| BATS 348, Lab 729                      | 31.66 N 64.166 W    | 80        | 06-16-2018               | 08:00:00                           | PXD043218                                                               |
| BATS 348, Lab 774                      | 31.66 N 64.166 W    | 80        | 06-16-2018               | 08:00:00                           | PXD043218                                                               |
| BATS 348, Lab 811                      | 31.66 N 64.166 W    | 80        | 06-16-2018               | 08:00:00                           | PXD043218                                                               |
| BATS 348, paired<br>metagenomic sample | 31.66 N 64.166 W    | 80        | 06-16-2018               | 08:00:00                           | Bioproject Accession:<br>PRJNA932835; SRA<br>submission:<br>SUB12819843 |
| <i>Informatics<br/>intercomparison</i> | --                  | --        | --                       | --                                 | --                                                                      |
| AE1913, Ocean 8<br>Clio020             | 33.128 N 65.967 W   | 120       | 06-19-2019               | 16:56:57                           | PXD044234                                                               |
| AE1913, Ocean 11<br>Clio020            | 33.128 N 65.967 W   | 20        | 06-19-2019               | 16:56:57                           | PXD044234                                                               |

24

25

26

27

28 **Table S4. Experimental guidelines in ocean metaproteome intercomparison project**

| Parameter                | Guideline(s)                                                                                                                                               |
|--------------------------|------------------------------------------------------------------------------------------------------------------------------------------------------------|
| Extraction and digestion | Extraction of participant's choice, trypsin digestion                                                                                                      |
| Chromatography           | 1-dimension of chromatography, at least 60 minutes of separation time, triplicate analyses                                                                 |
| Total protein injected   | 1 µg suggested. Allowable range 0.25 - 2 µg                                                                                                                |
| Isotope Tagging          | No isotope tags                                                                                                                                            |
| Mass spectrometry        | Data Dependent Analyses (DDA), participant's choice of parameters                                                                                          |
| Informatics pipeline     | Participants choice of software tools. Report in Spectral Counts. Protein and peptide results to be <1 % false discovery rate (FDR), 1 peptide per protein |

29

30

31 **Table S5.** Laboratory intercomparison sample extraction method and LC method.  
 32  
 33

| Lab ID | Extraction Method                                                                                                                                                             | LC method                                                                                                                                                                                                                                                                                                                                                                                                                                                                                                                                                                                   |
|--------|-------------------------------------------------------------------------------------------------------------------------------------------------------------------------------|---------------------------------------------------------------------------------------------------------------------------------------------------------------------------------------------------------------------------------------------------------------------------------------------------------------------------------------------------------------------------------------------------------------------------------------------------------------------------------------------------------------------------------------------------------------------------------------------|
| 127    | 2% SDS buffer 95oC; S-Trap purification and digestion                                                                                                                         | 180 min run, 5% B (0.1% FA in acetonitrile) to 30% B over 135 min, 30% B to 55% B over 12 min. A solvent 0.1% formic acid in water                                                                                                                                                                                                                                                                                                                                                                                                                                                          |
| 135    | 5% SDS + 0.1M TEAB, tip sonication, S-trap digestion, c18 SPE                                                                                                                 | --                                                                                                                                                                                                                                                                                                                                                                                                                                                                                                                                                                                          |
| 209    | 2% SDS, 95°C + sonication; acetone precipitation; FASP cleanup & digestion                                                                                                    | 270 min run; 98% A (0.1 formic acid in water)/2% B (0.1% formic acid in acetonitrile) to 30% B over 130min, to 70% B over 45min                                                                                                                                                                                                                                                                                                                                                                                                                                                             |
| 438    | 1% SDS buffer 95oC; SP3 bead purification and digestion                                                                                                                       | 200 min run, 95% A (0.1 formic acid in water) to 95% B (0.1% formic acid in acetonitrile) nonlinear over 170 min, with a flow rate of 500nM min <sup>-1</sup> --                                                                                                                                                                                                                                                                                                                                                                                                                            |
| 593    | 7M Urea 2M Thiourea, 1% DTT 2% CHAPS, vortex and sonicate, spin, ultrafiltration 30kD, filter aided sample prep (FASP) in solution digestion, desalt with C18 tips            | 180min gradient from 98% solution A (0.1% formic acid) and 2% solution B (90% acetonitrile and 0.1% formic acid) at 0 min to 40% solution B at 180 min with a flow rate of 300 nL min <sup>-1</sup> .                                                                                                                                                                                                                                                                                                                                                                                       |
| 652    | 5% SDS + 0.1M TEAB applied to filters in ziplock, tip sonication, S-trap digestion, c18 SPE                                                                                   | 120 min run, 5% B (0.1% FA in acetonitrile) to 30% B over 90 min, 30% B to 55% B over 10 min. A solvent 0.1% formic acid in water                                                                                                                                                                                                                                                                                                                                                                                                                                                           |
| 729    | 4% SDS sonication, protein aggregation capture                                                                                                                                | a linear organic gradient of 100% solvent A (95% water, 5% acetonitrile, 0.1% formic acid) to 25% solvent B (70% acetonitrile, 30% water, and 0.1% formic acid) for 180 minutes                                                                                                                                                                                                                                                                                                                                                                                                             |
| 774    | 2.1% SDS (2X Laemmli buffer); SDS gel plug; 8M Urea; sonication                                                                                                               | Sample was loaded on to a fused silica trap column (Acclaim PepMap 100, 75umx2cm, ThermoFisher). After washing for 5 min at 5 µl/min with 0.1% TFA, the trap column was brought in-line with an analytical column (Nanoease MZ peptide BEH C18, 130A, 1.7um, 75umx250mm, Waters) for LC-MS/MS. Peptides were fractionated at 300 nL/min using a segmented linear gradient 4-15% B in 30min (where A: 0.2% formic acid, and B: 0.16% formic acid, 80% acetonitrile), 15-25%B in 40min, 25-50%B in 44min, and 50-90%B in 11min. Solution B then returns at 4% for 5 minutes for the next run. |
| 811    | Bead beating and 3 freeze thaw cycles with Ammonium bicarbonate (50mM) and EDTA (5mM), centrifugation, then TCEP, iodoacetamide, DTT, trypsin, desalted with C18 spin columns | Solvents of 100% LC/MS grade water with 0.1% formic acid (A) and 100% LC/MS grade acetonitrile with 0.1% formic acid (B) were used to elute peptides over a 90-minute gradient from 5-35% solvent B                                                                                                                                                                                                                                                                                                                                                                                         |

34 **Table S6.** Chromatographic parameters and mass spectrometer and resolution employed. See  
 35 Table S5 for LC method and Table S7 for mass spectrometer parameters.

| Lab ID | Column Length (cm) | Column Width (µm) | LC Resin                                         | LC flow rate (nl/min) | LC gradient time (min) | Trap Column or Direct Injection | LC system            | Mass Spectrometer           | MS1 resolution    |
|--------|--------------------|-------------------|--------------------------------------------------|-----------------------|------------------------|---------------------------------|----------------------|-----------------------------|-------------------|
| 127    | 50                 | 100               | C18 Jupiter                                      | 250                   | 147                    | direct                          | Dionex LC            | QExactive                   | 35,000 or 140,000 |
| 135    | 25                 | 75                | C18 Acclaim PepMap RSLC 2µm                      | 300                   | 65                     | trap                            | Dionex LC 3000       | Lumos Tribrid               | 60,000            |
| 209    | 200                | 100               | C18 monolith (GL Sciences)                       | 360                   | 188                    | trap                            | Dionex 3000          | Orbitrap Elite              | 120,000           |
| 438    | 25                 | 100               | 3 µm C18 beads (Dr. Maisch)                      | 500                   | 200                    | trap                            | Dionex 3000          | Fusion Tribrid              | 240,000           |
| 593    | 50                 | 75                | 2µm C18 beads                                    | 300                   | 270                    | --                              | Dionex UltiMate 3000 | QExactive                   | 120,000           |
| 652    | 30                 | 75                | 3 µm C18 beads (Dr. Maisch)                      | 250                   | 90                     | trap                            | Thermo Easy-LC UPLC  | QExactive                   | 70,000            |
| 729    | 15                 | 75                | 1.7µm Kinetex C-18 (Phenomenex)                  | 150                   | 180                    | trap                            | Vanquish Ultra-HPLC  | QExactive Plus              | 70,000            |
| 774    | 25                 | 75                | Peptide BEH                                      | 300                   | 120                    | trap                            | Dionex RSLC          | Thermo Eclipse              | 120,000           |
| 811    | 37                 | 75                | C18 particles (Magic C18AQ, 100 Å, 5µm; Michrom) | 300                   | 90                     | precolumn                       | Easy-nLC 1200        | Thermo Q Exactive Plus HRMS | 70,000            |

36

37



38 **Table S7.** Chromatographic parameters and mass spectrometer and resolution employed. See

39 Table S5 for LC method and Table S6 for chromatographic parameters and mass spectrometer

40 and resolution employed.

| Lab ID | MS1 AGC target | Max Injection Time (ms) | MS1 Scan Range | MS2 Detector | Resolution or Scan rate | Minimum AGC target | Max Injection Time (ms) | Loop count (N) or cycle time (s) | Isolation Window | Activation Type | Collision Energy | Charge States Included | Dynamic Exclusion (s) |
|--------|----------------|-------------------------|----------------|--------------|-------------------------|--------------------|-------------------------|----------------------------------|------------------|-----------------|------------------|------------------------|-----------------------|
| 127    | 3.00E+06       | 100                     | 400-2000       | orbitrap     | 17,500                  | 5.00E+03           | 60                      | Top N 12, Top N 8                | 2                | HCD             | 27               | 2,3,4                  | 30                    |
| 135    | 4.00E+05       | 50                      | 375-1500       | orbitrap     | 15,000                  | 2.00E+05           | 30                      | TopN, 3sec                       | 1.3              | HCD             | 32               | 2,3,4,5,6              | 60                    |
| 209    | 1.00E+06       | 100                     | 300-1800       | ion trap     | rapid                   | 1.00E+04           | 100                     | TopN 15                          | 2                | CID             | 35               | >1                     | 30                    |
| 438    | 4.00E+05       | 50                      | 380-1280       | ion trap     | normal rate             | 2.00E+04           | 150                     | 2 s cycle                        | 1.6              | HCD             | 30               | 2,3,4,5,6,7,8          | 15                    |
| 593    | --             | --                      | 350-1800       | orbitrap     | --                      | --                 | --                      | 20                               | --               | CID             | --               | >1                     | 30                    |
| 652    | 1.00E+06       | 100                     | 400-1400       | orbitrap     | 35,000                  | 5.00E+04           | 50                      | 20                               | 1.2              | HCD             | 30               | 2,3,4,5                | 10                    |
| 729    | 1.00E+06       | 25                      | 300-1500       | orbitrap     | 17,500                  | 1.00E+05           | 50                      | 20                               | 1.8              | HCD             | 27               | 2,3,4,5                | 30                    |
| 774    | 8.00E+05       | auto                    | 375-1500       | orbitrap     | 15,000                  | 1.00E+05           | 50                      | 3                                | 1.2              | HCD             | 30               | 2-7                    | 60                    |
| 811    | 5.00E+04       | 50                      | 375-1575       | orbitrap     | 17,500                  | 5.00E+04           | 50                      | 20                               | 1.2              | HCD             | 25               | 2,3,4,5                | 30                    |

41

42

43

44 **Table S8.** Participant laboratory results: User provided results from diverse informatic pipelines.

45 NA – not available. Multiple values reported if protein groupings were used, based on the output

46 formats and protein inference methods of the various informatic pipelines used.

| Lab | Total Unique Peptides | Protein IDs |
|-----|-----------------------|-------------|
| 127 | 22382                 | 3520        |
| 135 | 9797                  | NA          |
| 209 | 2363                  | 4359 / 1049 |
| 438 | 15903                 | 5771        |
| 593 | 131                   | 89          |
| 652 | 11979                 | 2089        |
| 729 | 11204                 | 4907        |
| 774 | 18859                 | 5946        |
| 811 | 3515                  | NA          |

47

48 **Table S9.** Participant laboratory results using the single pipeline re-analysis. Raw data files  
49 were processed SEQUEST HT and Scaffold resulted in these sums of total unique peptides,  
50 total proteins, and protein groups.

| Lab | Total Unique Peptides | Total Protein IDs | Protein Groups |
|-----|-----------------------|-------------------|----------------|
| 135 | 9600                  | 3919              | 3533           |
| 209 | 3354                  | 1586              | 1461           |
| 438 | 15646                 | 6221              | 5621           |
| 593 | 0                     | 0                 | 0              |
| 652 | 9106                  | 3518              | 3189           |
| 729 | 6626                  | 3522              | 3202           |
| 774 | 16500                 | 5676              | 5111           |
| 811 | 14                    | 12                | 12             |
| 127 | 12615                 | 5080              | 4595           |

51

52 **Table S10.** Participant laboratory results passed through the single pipeline re-analysis, using  
53 alternate chromatographic techniques. Raw data files were processed SEQUEST HT and  
54 Scaffold resulted in these sums of total unique peptides, total proteins, and protein groups.

| Lab             | Total Unique Peptides | Total Protein IDs |
|-----------------|-----------------------|-------------------|
| Alt-1 (12h run) | 7060                  | 2832              |
| Alt-2 (2D)      | 18477                 | 7765              |
| Alt-3 (2D)      | 5852                  | 2746              |

55

56 **Table S11.** Informatic intercomparison study: anonymous laboratory identification numbers,  
 57 software used, and results. NA – not available.

58

| ID  | Software                                       | Unique Peptides |           |
|-----|------------------------------------------------|-----------------|-----------|
|     |                                                | Oceans 8        | Oceans 11 |
| 109 | Peaks Studio X                                 | 4522            | 4898      |
| 321 | SearchGUI / Peptide Shaker                     | 2768            | 7389      |
| 321 | MaxQuant                                       | 3342            | 4751      |
| 362 | X!Tandem / SearchGUI                           | 4890            | 8079      |
| 458 | SEQUEST-HT / Percolator                        | 6369            | 8288      |
| 501 | MSGF+ OpenMS                                   | 4025            | 7463      |
| 828 | SEQUEST-HT PD                                  | NA              | NA        |
| 902 | SEQUEST-HT / Percolator                        | 4653            | 7649      |
| 932 | MASCOT                                         | 1724            | 3019      |
| 957 | MsFragger / PeptideProphet /<br>ProteinProphet | 3687            | 6144      |

59

60

61

62 **Table S12. Summary Table of Laboratory Intercomparison Results**

|                                           | Lab_127 | Lab_135 | Lab_209 | Lab_438 | Lab_652 | Lab_729 | Lab_774 | Average  | Std Dev  | Sum 7 SC |
|-------------------------------------------|---------|---------|---------|---------|---------|---------|---------|----------|----------|----------|
| Sum of Spectral Counts (SC)               | 73828   | 38784   | 63198   | 126642  | 69677   | 53166   | 70606   | 70843    | 27455    | 495901   |
| Number of Peptide IDs                     | 12615   | 9600    | 3354    | 15646   | 9106    | 6626    | 16500   | 10492    | 4757     | --       |
| Number of Protein IDs                     | 5080    | 3919    | 1586    | 6221    | 3518    | 3522    | 5676    | 4217     | 1574     | --       |
| Number of Protein Groups                  | 4595    | 3533    | 1461    | 5621    | 3189    | 3202    | 5111    | 3816     | 1411     | --       |
|                                           |         |         |         |         |         |         |         | Average* | Std Dev* |          |
| Average Shared Peptides (pairwise 7 labs) | 2821.0  | 2422.8  | 1304.2  | 2945.0  | 2325.7  | 2241.5  | 2769.2  | 2404     | 554      | --       |
| Average R2 (pairwise 7 labs)*             | 0.708   | 0.586   | 0.589   | 0.713   | 0.652   | 0.604   | 0.583   | 0.63     | 0.06     | --       |
| Average Slope (pairwise 7 labs)           | 1.099   | 3.014   | 1.617   | 1.386   | 1.297   | 1.028   | 0.710   | 1.45     | 0.75     | --       |
| Dynamic Exclusion Time (s)                | 30      | 60      | 30      | 15      | 10      | 30      | 60      | 33.57    | 19.73    | --       |

\*average and standard deviation of all pairwise comparisons

63

64 **Figure S1.** Results from user submitted data reports for laboratory intercomparison. a) Total  
 65 number of unique peptide identifications by laboratory. A total of 35715 unique peptides were  
 66 detected across all six laboratories. Note any peptides with PTMs were removed and not  
 67 counted. b) Total number of protein identifications, note that some laboratory groups did not  
 68 provide protein results (135 and 811). c) Pairwise comparisons of shared peptides between six  
 69 laboratories ranged from 3844 to 10877 and averaged 7142 +/- 2074 identified peptides,  
 70 demonstrating reproducibility of peptides identifications between laboratories. Note that PTMs  
 71 were not taken into account for the uniqueness of peptides.

72  
 73  
 74  
 75

76

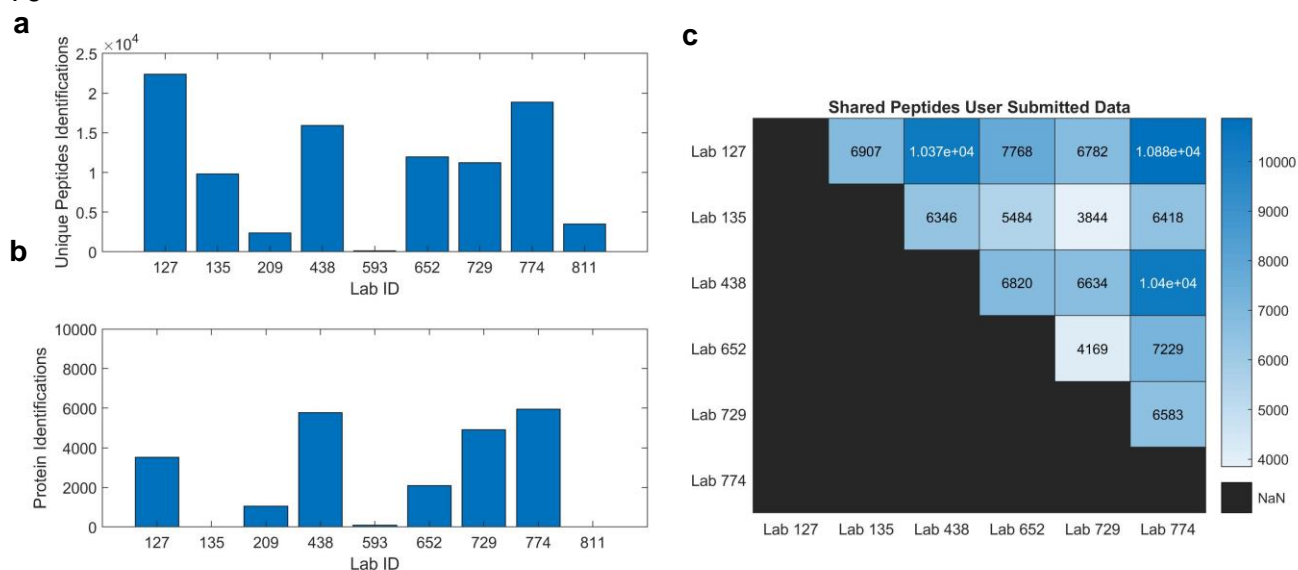

79  
 80  
 81

82 **Figure S2.** Results of pair-wise two-way linear regression analyses for re-analysis of submitted  
 83 raw data from laboratory intercomparison, corresponding to Figure 4.

84

85

86

87

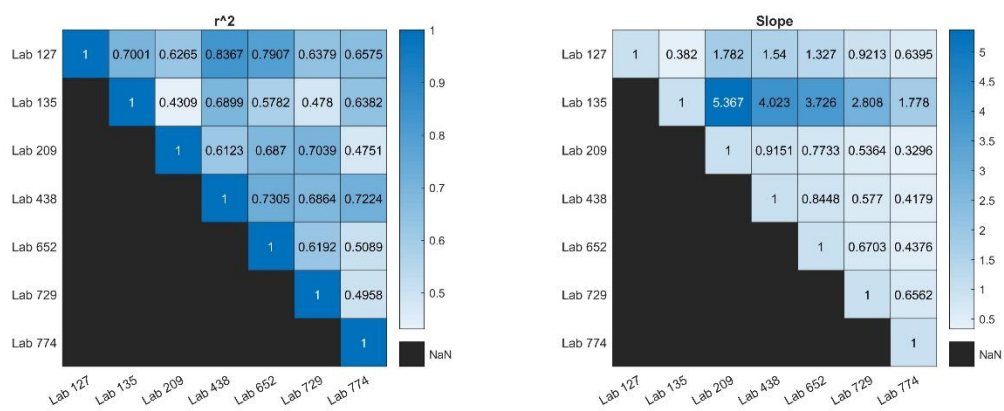



88 **Figure S3. Quantitative Sørensen similarity analysis.** Sørensen similarity analysis on full  
 89 protein dataset. See Fig. 6 for analysis of top 1000 proteins.

90

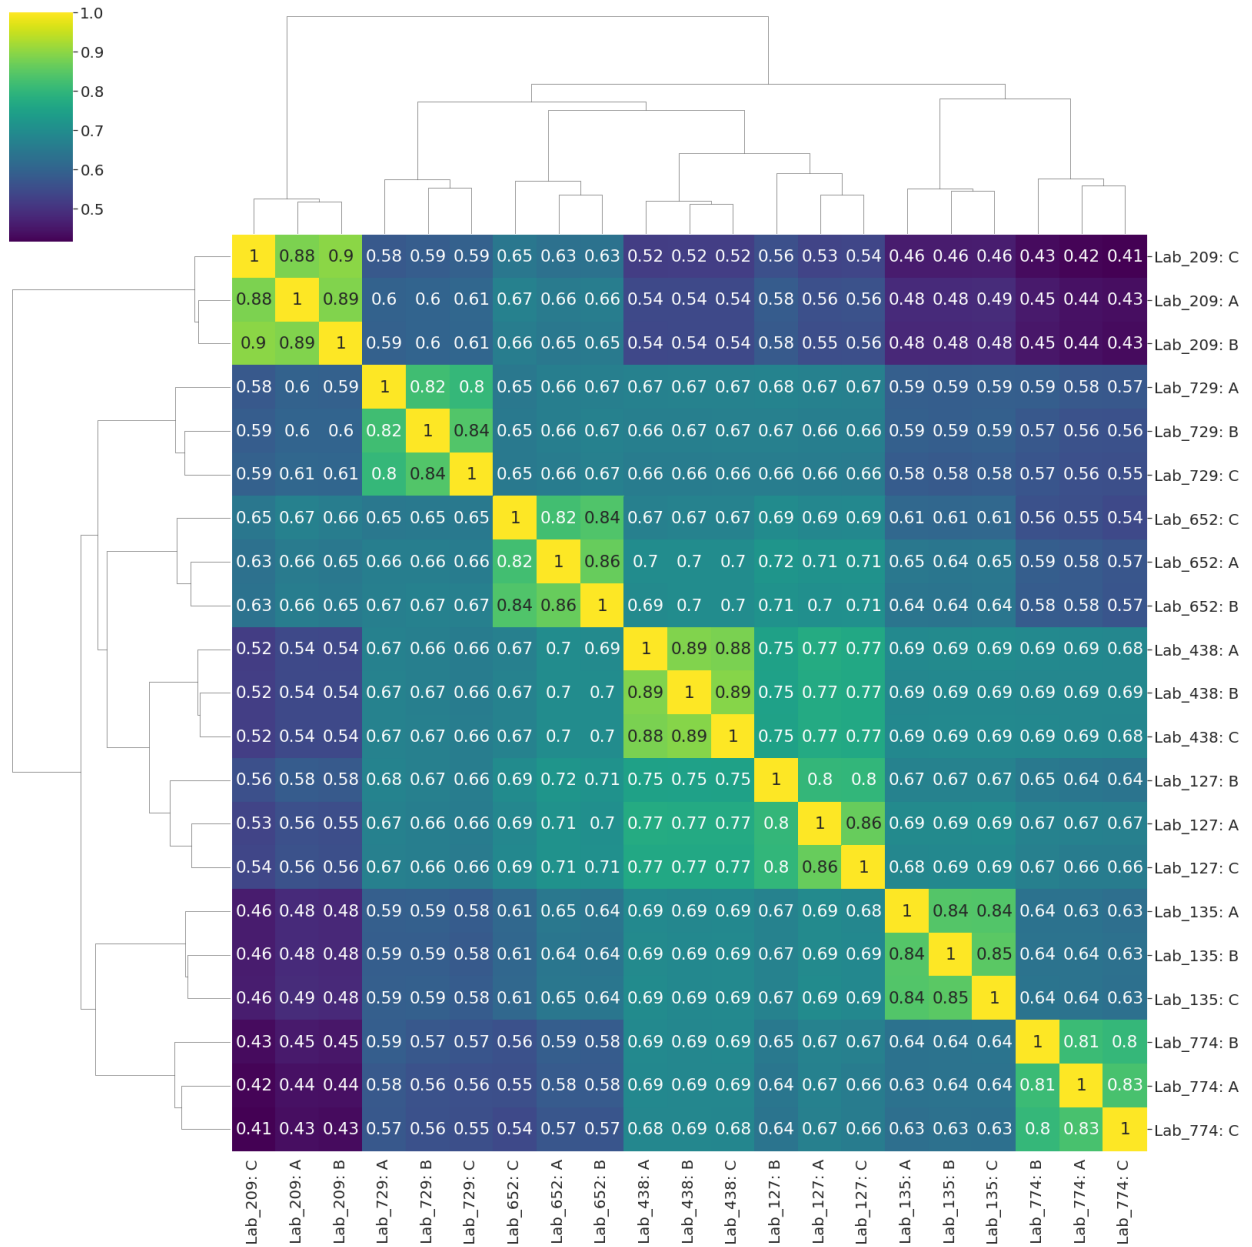

91

92

93

94

95 **Figure S4.** Phylum distribution within metagenomic annotations with sum of each taxa as a  
96 fraction of all annotated genes.  
97

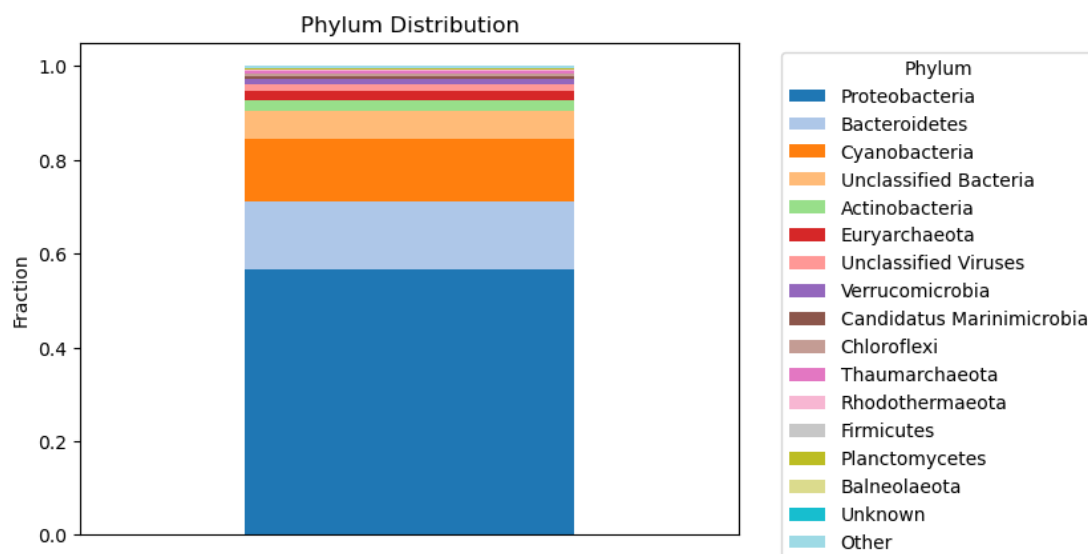

98
